# Supplementary material
Source: PubMed Central journal article supplement (PMC2731241)
Supplement: NIHMS126946-supplement-1.pdf [file NIHMS126946-supplement-1.pdf]

**Table S1.** *C. elegans* resources

| Resource                                                            | Description                                                                                                                                                        | Location and URL                                                                                                                                                                                                                                                                                                                                                                                                                                                                                                                                                                                                                                                                                                                                                                                                         |
|---------------------------------------------------------------------|--------------------------------------------------------------------------------------------------------------------------------------------------------------------|--------------------------------------------------------------------------------------------------------------------------------------------------------------------------------------------------------------------------------------------------------------------------------------------------------------------------------------------------------------------------------------------------------------------------------------------------------------------------------------------------------------------------------------------------------------------------------------------------------------------------------------------------------------------------------------------------------------------------------------------------------------------------------------------------------------------------|
| <b>DATABASES AND ON-LINE REFERENCES</b>                             |                                                                                                                                                                    |                                                                                                                                                                                                                                                                                                                                                                                                                                                                                                                                                                                                                                                                                                                                                                                                                          |
| WormBase                                                            | complete genomic DNA, gene and protein database (100 Mbp, ~19,000 coding sequences, non-coding RNAs), SNPs for genotyping, protein database, yeast two-hybrid data | <a href="http://www.wormbase.org">http://www.wormbase.org</a><br>For comparative sequence browsing:<br><i>C. elegans</i><br>( <a href="http://www.wormbase.org/db/seq/gbrowse/wormbase/">http://www.wormbase.org/db/seq/gbrowse/wormbase/</a> )<br><i>C. briggsae</i><br>( <a href="http://C.elwww.wormbase.org/db/seq/gbrowse/briggsae/">http://C.elwww.wormbase.org/db/seq/gbrowse/briggsae/</a> )<br><i>C. remanei</i><br>( <a href="http://dev.wormbase.org/db/seq/gbrowse/remanei/">http://dev.wormbase.org/db/seq/gbrowse/remanei/</a> )                                                                                                                                                                                                                                                                           |
| WormPD<br>WormGenes                                                 | commercial protein database<br>NCBI AceView of <i>C. elegans</i> genes.<br>Annotation and references based on curated cDNAs                                        | <a href="https://www.proteome.com/proteome/">https://www.proteome.com/proteome/</a><br><a href="http://www.wormgenes.org">http://www.wormgenes.org</a>                                                                                                                                                                                                                                                                                                                                                                                                                                                                                                                                                                                                                                                                   |
| RNAiDB                                                              | summary of RNAi constructs, phenotypes and off target hits                                                                                                         | <a href="http://www.rnai.org">http://www.rnai.org</a>                                                                                                                                                                                                                                                                                                                                                                                                                                                                                                                                                                                                                                                                                                                                                                    |
| PhenoBank                                                           | genome-wide RNAi screening for genes that effect the first two rounds of mitotic cell division as seen with time-lapse video microscopy.                           | <a href="http://www.phenobank.org">http://www.phenobank.org</a>                                                                                                                                                                                                                                                                                                                                                                                                                                                                                                                                                                                                                                                                                                                                                          |
| GeneOrienteer                                                       | prediction of genetic interactions                                                                                                                                 | <a href="http://tenaya.caltech.edu:8000/predict">http://tenaya.caltech.edu:8000/predict</a>                                                                                                                                                                                                                                                                                                                                                                                                                                                                                                                                                                                                                                                                                                                              |
| NBrowse                                                             | an interactive graphical browser for molecular interaction networks                                                                                                | <a href="http://gnetbrowse.org">http://gnetbrowse.org</a>                                                                                                                                                                                                                                                                                                                                                                                                                                                                                                                                                                                                                                                                                                                                                                |
| <i>C. elegans</i> WWW Server                                        | superb resource for variety of <i>C. elegans</i> information and portals to other sites and protocols                                                              | Leone Avery's laboratory:<br><a href="http://elegans.swmed.edu/">http://elegans.swmed.edu/</a>                                                                                                                                                                                                                                                                                                                                                                                                                                                                                                                                                                                                                                                                                                                           |
| WormBook                                                            | comprehensive treatise on <i>C. elegans</i> biology, chapters continuously updated (downloadable pdf's) by investigators                                           | <a href="http://www.wormbook.org/">http://www.wormbook.org/</a>                                                                                                                                                                                                                                                                                                                                                                                                                                                                                                                                                                                                                                                                                                                                                          |
| <i>C. elegans</i> II                                                | on-line version of the authoritative text in <i>C. elegans</i> anatomy, biology, genetics and procedures                                                           | <a href="http://www.ncbi.nlm.nih.gov/books/bv.fcgi?call=bv.View..ShowTOC&amp;rid=ce2.TOC">http://www.ncbi.nlm.nih.gov/books/bv.fcgi?call=bv.View..ShowTOC&amp;rid=ce2.TOC</a>                                                                                                                                                                                                                                                                                                                                                                                                                                                                                                                                                                                                                                            |
| Genetic nomenclature                                                | submission site and description of new strains, genes and phenotypes                                                                                               | <a href="http://www.wormbase.org/wiki/index.php/Nomenclature">http://www.wormbase.org/wiki/index.php/Nomenclature</a>                                                                                                                                                                                                                                                                                                                                                                                                                                                                                                                                                                                                                                                                                                    |
| Princeton Protein Orthology Database (P-POD)                        | orthologues from multiple species with an emphasis on providing information about disease-related genes                                                            | <a href="http://ortholog.princeton.edu/help.html">http://ortholog.princeton.edu/help.html</a>                                                                                                                                                                                                                                                                                                                                                                                                                                                                                                                                                                                                                                                                                                                            |
| <b>REAGENTS</b>                                                     |                                                                                                                                                                    |                                                                                                                                                                                                                                                                                                                                                                                                                                                                                                                                                                                                                                                                                                                                                                                                                          |
| Caenorhabditis Genetics Center (CGC) at the University of Minnesota | repository and distributor of mutant strain (minimal fee)                                                                                                          | <a href="http://www.cbs.umn.edu/CGC/">http://www.cbs.umn.edu/CGC/</a>                                                                                                                                                                                                                                                                                                                                                                                                                                                                                                                                                                                                                                                                                                                                                    |
| Gene knockout consortia                                             | most strains available through the CGC, or contact center or strains or to fast-track isolation of a desired mutant                                                | <i>C. elegans</i> Gene Knockout Consortium (University of Oklahoma):<br><a href="http://celeganskoconsortium.omrf.org/">http://celeganskoconsortium.omrf.org/</a> ;<br>University of British Columbia:<br><a href="http://www.zoology.ubc.ca/~alorch/research1.htm">http://www.zoology.ubc.ca/~alorch/research1.htm</a> ; BC Genome Science Centre: <a href="http://www.bcgsc.bc.ca/">http://www.bcgsc.bc.ca/</a> ;<br>National Bioresource Project for the Experimental Animal Nematode <i>C. elegans</i> (Japan):<br><a href="http://www.grs.nig.ac.jp/c.elegans/index.jsp">http://www.grs.nig.ac.jp/c.elegans/index.jsp</a> ;<br>EMBL-transposon <i>C. elegans</i> transposon insertion project (Tc and Mos insertions, Laurent Segalat: <a href="mailto:segalat@cgmc.univ-lyon1.fr">segalat@cgmc.univ-lyon1.fr</a> ; |

|                                                                  |                                                                                                                                                                      |                                                                                                                                                                                                                                                                                                                                                                                                                                                                                                                                                                                                                                                                                                                                                                                                                                                                                                                                                                                                                                                                                                                                                                                                                                                                                                                                                                                                                                                                                                                                                                                                                                                                                                                                                                                                                                                                                                                                                                                                                                                                                                                                                                                                                                                                                                                                                                                                                                                                                                                                                                                          |
|------------------------------------------------------------------|----------------------------------------------------------------------------------------------------------------------------------------------------------------------|------------------------------------------------------------------------------------------------------------------------------------------------------------------------------------------------------------------------------------------------------------------------------------------------------------------------------------------------------------------------------------------------------------------------------------------------------------------------------------------------------------------------------------------------------------------------------------------------------------------------------------------------------------------------------------------------------------------------------------------------------------------------------------------------------------------------------------------------------------------------------------------------------------------------------------------------------------------------------------------------------------------------------------------------------------------------------------------------------------------------------------------------------------------------------------------------------------------------------------------------------------------------------------------------------------------------------------------------------------------------------------------------------------------------------------------------------------------------------------------------------------------------------------------------------------------------------------------------------------------------------------------------------------------------------------------------------------------------------------------------------------------------------------------------------------------------------------------------------------------------------------------------------------------------------------------------------------------------------------------------------------------------------------------------------------------------------------------------------------------------------------------------------------------------------------------------------------------------------------------------------------------------------------------------------------------------------------------------------------------------------------------------------------------------------------------------------------------------------------------------------------------------------------------------------------------------------------------|
|                                                                  |                                                                                                                                                                      | <a href="http://www.cgmc.univ-lyon1.fr/cgmc_info_celeganstp.php">http://www.cgmc.univ-lyon1.fr/cgmc_info_celeganstp.php</a>                                                                                                                                                                                                                                                                                                                                                                                                                                                                                                                                                                                                                                                                                                                                                                                                                                                                                                                                                                                                                                                                                                                                                                                                                                                                                                                                                                                                                                                                                                                                                                                                                                                                                                                                                                                                                                                                                                                                                                                                                                                                                                                                                                                                                                                                                                                                                                                                                                                              |
| EST databases and cDNA libraries                                 | clones and sequences available                                                                                                                                       | Yuji Kohara clones:<br><a href="http://www.ddbj.nig.ac.jp/">http://www.ddbj.nig.ac.jp/</a><br>M. Vidal (WORFDB, the ORFeome Project),<br>( <a href="http://worfdb.dfc.harvard.edu/">http://worfdb.dfc.harvard.edu/</a> )<br>ORFeome v1.1 available from GeneService LTD :<br><a href="http://www.geneservice.co.uk/products/cdna/Celegans_ORF.jsp">http://www.geneservice.co.uk/products/cdna/Celegans_ORF.jsp</a> and v3.1 available from Open Biosystems:<br><a href="http://www.openbiosystems.com/GeneExpression/Non%2DMammalian/Worm/C%5F%20elegans%20ORFs/AhringerRNAiFeedingLibrary">http://www.openbiosystems.com/GeneExpression/Non%2DMammalian/Worm/C%5F%20elegans%20ORFs/AhringerRNAiFeedingLibrary</a> ( <a href="http://www.gurdon.cam.ac.uk/~ahringierlab/pages/rnai.html">http://www.gurdon.cam.ac.uk/~ahringierlab/pages/rnai.html</a> ) available from GeneService LTD:<br><a href="http://geneservice.co.uk/products/rnai/VidalRNAiFeedingLibrary">http://geneservice.co.uk/products/rnai/VidalRNAiFeedingLibrary</a> v1.1 ( <a href="http://worfdb.dfc.harvard.edu/">http://worfdb.dfc.harvard.edu/</a> ) available from Open Biosystems:<br><a href="http://www.openbiosystems.com/GeneExpression/Non%2DMammalian/Worm/CelegansORF%2DRNAi/">http://www.openbiosystems.com/GeneExpression/Non%2DMammalian/Worm/CelegansORF%2DRNAi/</a> available from Open Biosystems:<br><a href="http://www.openbiosystems.com/GeneExpression/Non%2DMammalian/Worm/CelegansPromoters/">http://www.openbiosystems.com/GeneExpression/Non%2DMammalian/Worm/CelegansPromoters/</a> available from Open Biosystems:<br><a href="http://www.openbiosystems.com/GeneExpression/Non%2DMammalian/Worm/TranscriptionFactors/">http://www.openbiosystems.com/GeneExpression/Non%2DMammalian/Worm/TranscriptionFactors/</a><br><a href="http://www.sanger.ac.uk/Projects/C_elegans/">http://www.sanger.ac.uk/Projects/C_elegans/</a> ;<br><a href="http://www.geneservice.co.uk/products/clones/index.jsp">http://www.geneservice.co.uk/products/clones/index.jsp</a><br><a href="http://www.addgene.org/pgvec1?f=c&amp;cmd=showcol&amp;colid=1">http://www.addgene.org/pgvec1?f=c&amp;cmd=showcol&amp;colid=1</a><br>Sugimoto laboratory <i>C. elegans</i> Monoclonal Antibody Collection:<br><a href="http://www.cdb.riken.jp/dge/KTmAbDB/KTtop.html">http://www.cdb.riken.jp/dge/KTmAbDB/KTtop.html</a><br>Nonet laboratory:<br><a href="http://neuroscience.wustl.edu/nonetlab/ResourcesF/MonoclonalsMade.html">http://neuroscience.wustl.edu/nonetlab/ResourcesF/MonoclonalsMade.html</a> |
| RNAi libraries                                                   | arrayed feeding libraries, most have been assayed and phenotypes in WormBase along with primer design for target construction, validation of clone inserts suggested |                                                                                                                                                                                                                                                                                                                                                                                                                                                                                                                                                                                                                                                                                                                                                                                                                                                                                                                                                                                                                                                                                                                                                                                                                                                                                                                                                                                                                                                                                                                                                                                                                                                                                                                                                                                                                                                                                                                                                                                                                                                                                                                                                                                                                                                                                                                                                                                                                                                                                                                                                                                          |
| Promoter collection library                                      | for expression and yeast one-hybrid assays                                                                                                                           |                                                                                                                                                                                                                                                                                                                                                                                                                                                                                                                                                                                                                                                                                                                                                                                                                                                                                                                                                                                                                                                                                                                                                                                                                                                                                                                                                                                                                                                                                                                                                                                                                                                                                                                                                                                                                                                                                                                                                                                                                                                                                                                                                                                                                                                                                                                                                                                                                                                                                                                                                                                          |
| Transcription factor library                                     | for yeast one-hybrid assays                                                                                                                                          |                                                                                                                                                                                                                                                                                                                                                                                                                                                                                                                                                                                                                                                                                                                                                                                                                                                                                                                                                                                                                                                                                                                                                                                                                                                                                                                                                                                                                                                                                                                                                                                                                                                                                                                                                                                                                                                                                                                                                                                                                                                                                                                                                                                                                                                                                                                                                                                                                                                                                                                                                                                          |
| Genomic DNA clones                                               | BACs, YACs, fosmids, cosmids                                                                                                                                         |                                                                                                                                                                                                                                                                                                                                                                                                                                                                                                                                                                                                                                                                                                                                                                                                                                                                                                                                                                                                                                                                                                                                                                                                                                                                                                                                                                                                                                                                                                                                                                                                                                                                                                                                                                                                                                                                                                                                                                                                                                                                                                                                                                                                                                                                                                                                                                                                                                                                                                                                                                                          |
| Fire cloning and expression vectors                              | 1995,1997 and 1999 plates (n = 288 vectors)                                                                                                                          |                                                                                                                                                                                                                                                                                                                                                                                                                                                                                                                                                                                                                                                                                                                                                                                                                                                                                                                                                                                                                                                                                                                                                                                                                                                                                                                                                                                                                                                                                                                                                                                                                                                                                                                                                                                                                                                                                                                                                                                                                                                                                                                                                                                                                                                                                                                                                                                                                                                                                                                                                                                          |
| Monoclonal antibodies                                            | contact centers for antibodies or prospect for generating reagents                                                                                                   |                                                                                                                                                                                                                                                                                                                                                                                                                                                                                                                                                                                                                                                                                                                                                                                                                                                                                                                                                                                                                                                                                                                                                                                                                                                                                                                                                                                                                                                                                                                                                                                                                                                                                                                                                                                                                                                                                                                                                                                                                                                                                                                                                                                                                                                                                                                                                                                                                                                                                                                                                                                          |
| <b>EXPRESSION DATA</b>                                           |                                                                                                                                                                      |                                                                                                                                                                                                                                                                                                                                                                                                                                                                                                                                                                                                                                                                                                                                                                                                                                                                                                                                                                                                                                                                                                                                                                                                                                                                                                                                                                                                                                                                                                                                                                                                                                                                                                                                                                                                                                                                                                                                                                                                                                                                                                                                                                                                                                                                                                                                                                                                                                                                                                                                                                                          |
| The Nematode Expression Pattern DataBase                         | expression of GFP and lacZ reporters                                                                                                                                 | NEXTDB (Kohara laboratory):<br><a href="http://nematode.lab.nig.ac.jp/">http://nematode.lab.nig.ac.jp/</a><br>BC Genome Sciences Centre:<br><a href="http://www.bcgsc.ca/">http://www.bcgsc.ca/</a> ; promoter::GFP fusion expression patterns:<br><a href="http://gfpworm.org/index">http://gfpworm.org/index</a><br>Hope laboratory expression database:<br><a href="http://bgypc059.leeds.ac.uk/~web/data/baseintro.htm">http://bgypc059.leeds.ac.uk/~web/data/baseintro.htm</a>                                                                                                                                                                                                                                                                                                                                                                                                                                                                                                                                                                                                                                                                                                                                                                                                                                                                                                                                                                                                                                                                                                                                                                                                                                                                                                                                                                                                                                                                                                                                                                                                                                                                                                                                                                                                                                                                                                                                                                                                                                                                                                      |
| Serial Analysis of Gene Expression (SAGE)<br><i>In situ</i> mRNA | data repository, integrated into WormBase<br>data repository                                                                                                         | BC Genome Sciences Center:<br><a href="http://elegans.bcgsc.bc.ca/">http://elegans.bcgsc.bc.ca/</a><br><a href="http://nematode.lab.nig.ac.jp/db2/index.php">http://nematode.lab.nig.ac.jp/db2/index.php</a>                                                                                                                                                                                                                                                                                                                                                                                                                                                                                                                                                                                                                                                                                                                                                                                                                                                                                                                                                                                                                                                                                                                                                                                                                                                                                                                                                                                                                                                                                                                                                                                                                                                                                                                                                                                                                                                                                                                                                                                                                                                                                                                                                                                                                                                                                                                                                                             |

|                                 |                                                                                                                                                                  |                                                                                                                                                                                                                                                                                                                                                                                                                                                                                                                                                                             |
|---------------------------------|------------------------------------------------------------------------------------------------------------------------------------------------------------------|-----------------------------------------------------------------------------------------------------------------------------------------------------------------------------------------------------------------------------------------------------------------------------------------------------------------------------------------------------------------------------------------------------------------------------------------------------------------------------------------------------------------------------------------------------------------------------|
| Microarrays                     | oligonucleotide and cDNA arrays                                                                                                                                  | <a href="http://nematode.lab.nig.ac.jp/">http://nematode.lab.nig.ac.jp/</a><br>Washington University:<br><a href="http://genome.wustl.edu/genome/celegans/microarray/ma_gen_info.cgi">http://genome.wustl.edu/genome/celegans/microarray/ma_gen_info.cgi</a><br>Affymetrix:<br><a href="http://www.affymetrix.com/products/arrays/specific/celegans.affx">http://www.affymetrix.com/products/arrays/specific/celegans.affx</a><br>Agilent:<br><a href="http://www.chem.agilent.com/Scripts/PDS.asp?lPage=29452">http://www.chem.agilent.com/Scripts/PDS.asp?lPage=29452</a> |
| <b>ANATOMY AND DEVELOPMENT</b>  |                                                                                                                                                                  |                                                                                                                                                                                                                                                                                                                                                                                                                                                                                                                                                                             |
| <i>C. elegans</i> parts list    | cell lineage development                                                                                                                                         | <a href="http://elegans.swmed.edu/parts/parts.html">http://elegans.swmed.edu/parts/parts.html</a>                                                                                                                                                                                                                                                                                                                                                                                                                                                                           |
| WormAtlas                       | extensive database of behavioral and structural anatomy, including the SlidableWorm                                                                              | Center for <i>C. elegans</i> anatomy, AECOM: <a href="http://www.wormatlas.org/">http://www.wormatlas.org/</a>                                                                                                                                                                                                                                                                                                                                                                                                                                                              |
| Neuronal connectivity map       | deduced from extensive EM studies                                                                                                                                | <a href="http://www.wormatlas.org/handbook/nshandbook.htm/nswiring.htm">http://www.wormatlas.org/handbook/nshandbook.htm/nswiring.htm</a>                                                                                                                                                                                                                                                                                                                                                                                                                                   |
| WormImage                       | searchable archive of unpublished electron micrographs from several <i>C. elegans</i> labs                                                                       | <a href="http://www.wormimage.org/">http://www.wormimage.org/</a>                                                                                                                                                                                                                                                                                                                                                                                                                                                                                                           |
| <b>PARASITIC NEMATODES</b>      |                                                                                                                                                                  |                                                                                                                                                                                                                                                                                                                                                                                                                                                                                                                                                                             |
| Nematode.Net                    | compendium of nematode sequencing efforts and databases                                                                                                          | <a href="http://www.nematode.net">http://www.nematode.net</a>                                                                                                                                                                                                                                                                                                                                                                                                                                                                                                               |
| Nematode and neglected genomics | The Blaxter lab website with useful clinical, pylogenetic and genomic information including the Filarial genome project and links to the filarial genome network | <a href="http://www.nematodes.org">http://www.nematodes.org</a>                                                                                                                                                                                                                                                                                                                                                                                                                                                                                                             |

---

**Table S2.** Human disease-related genes conserved in *C. elegans*

| Disorder                                       | Human gene                                                                                                       | <i>C. elegans</i> gene    |
|------------------------------------------------|------------------------------------------------------------------------------------------------------------------|---------------------------|
| <b>INBORN ERRORS OF METABOLISM/SIMPLE</b>      |                                                                                                                  |                           |
| <b>MENDELIAN DISORDERS</b>                     |                                                                                                                  |                           |
| Aarskog-Scott syndrome                         | <i>FGD1</i> (guanine nucleotide exchange factor)                                                                 | <i>exc-5</i>              |
| Achondroplasia                                 | <i>FGFR3</i> (FGF receptor tyrosine kinase)                                                                      | <i>egl-15</i>             |
| Adrenoleukodystrophy, X-linked                 | <i>ALD</i> (peroxisomal membrane protein related)                                                                | <i>pmp-4</i>              |
| Agammaglobulinemia, X-linked                   | <i>BTK</i> (non-receptor tyrosine kinase)                                                                        | <i>abl-1</i>              |
| Alzheimer's disease                            | <i>AD3</i> and <i>4</i> (presenilins)                                                                            | <i>sel-12</i>             |
|                                                | <i>APP</i> (amyloid precursor protein)                                                                           | <i>apl-1</i>              |
| Amyloidosis I, hereditary neuropathic          | <i>TTR</i> (transthyretin/prealbumin)                                                                            | R09H10.3,<br>Y73B6BL.1    |
| Amyotrophic lateral sclerosis                  | <i>SOD1</i> (super oxide dismutase)                                                                              | <i>sod-4</i>              |
| Aniridia                                       | <i>PAX6</i> (paired homeobox domain)                                                                             | <i>vab-3</i>              |
| Ataxia telangiectasia                          | <i>AT</i> (PI-3 kinase-like domain)                                                                              | <i>atl-1</i>              |
| Barth syndrome                                 | <i>TAZ</i> (phosphate acyl transferase)                                                                          | <i>acl-2</i>              |
| Batten disease                                 | <i>CLN3</i> (small molecule transporter)                                                                         | <i>cln-3.1, .2 and .3</i> |
| Beckwith-Wiedemann syndrome                    | <i>GFII/2</i> (C2H2 zinc-finger protein)                                                                         | <i>pag-3</i>              |
| Benign familial neonatal convulsions           | <i>KCNQ2</i> (potassium channel)                                                                                 | <i>kqt-1</i>              |
| Bloom syndrome                                 | <i>BLM</i> (RecQ-like ATP-dependent DNA helicase)                                                                | <i>him-6</i>              |
| Cardiomyopathy, dilated, 1D                    | <i>TNNT2</i> (troponin T)                                                                                        | <i>tnt-3</i>              |
| Carnitine palmitoyltransferase I deficiency    | <i>CPT1A</i> (carnitine palmitoyltransferase I)                                                                  | <i>cpt-1</i>              |
| Carnitine palmitoyltransferase II deficiency   | <i>CPT2</i> (carnitine palmitoyltransferase II)                                                                  | <i>cpt-2</i>              |
| Charcot-Marie-Tooth disease, type 4B2          | <i>SBF1</i> (SET-binding factor)                                                                                 | <i>mtm-5</i>              |
| Chondrodysplasia punctata                      | <i>ARSA</i> (aryl sulfatase)                                                                                     | <i>sul-2</i>              |
| Chronic granulomatous disease                  | <i>NCF1</i> (neutrophil cytosolic factor-1)                                                                      | <i>itsn-1</i>             |
| Cystic fibrosis                                | <i>CFTR</i> (ABC transporter)                                                                                    | <i>mrp-2</i>              |
| Darier-White disease                           | <i>ATP2A1</i> (sarco-endoplasmic reticulum Ca <sup>2+</sup> ATPase)                                              | <i>sca-1</i>              |
| Deafness, non-syndromic                        | <i>DIAPH1</i> (Rho GTPase binding)                                                                               | <i>cyk-1</i>              |
| Diabetes mellitus                              | <i>IRF4</i> (insulin)                                                                                            | Y53F4B.10                 |
| Friedreich ataxia                              | <i>FRDA</i> (mitochondrial protein required for Fe/S protein biosynthesis)                                       | <i>frh-1</i>              |
| Galactosemia                                   | <i>GALT</i> (galactose-1-phosphate uridylyltransferase)                                                          | ZK1058.3                  |
| Gaucher disease                                | <i>GBA</i> (acid beta-glucosidase)                                                                               | F11E6.1                   |
| Glucose-6-phosphate 1-dehydrogenase deficiency | <i>G6PD</i> (glucose-6-phosphate dehydrogenase)                                                                  | B0035.5                   |
| Glutaricaciduria type IIC                      | <i>ETFDH</i> (electron-transferring-flavoprotein dehydrogenase)                                                  | <i>let-721</i>            |
| Glycerol kinase deficiency                     | <i>GK</i> (glycerol kinase)                                                                                      | R11F4.1                   |
| Glycogen storage disease, type III             | <i>AGL</i> (glycogen debranching enzyme isoform 6)                                                               | R06A4.8                   |
| Familial dysautonomia                          | <i>IKBKAP</i> (inhibitor of kappa light polypeptide gene enhancer in B-cells, kinase complex-associated protein) | <i>elpc-1</i>             |
| Hailey-Hailey disease                          | <i>ATP2C1</i> (Golgi P-type ATPase)                                                                              | <i>pmr-1</i>              |
| Hermansky-Pudlak syndrome                      | <i>AP-3</i> (adaptin)                                                                                            | <i>apm-3</i>              |
| Hirschsprung disease                           | <i>ECE1</i> (endothelin-converting enzyme 1)                                                                     | F18A12.8                  |
| Holoprosencephaly 5                            | <i>ZIC2</i> (zinc finger protein of cerebellum)                                                                  | <i>ref-2</i>              |
| Homocystinuria                                 | <i>MTHFR</i> (methylenetetrahydrofolate reductase)                                                               | C06A8.1                   |
| Huntington's disease                           | <i>HD</i> (huntingtin)                                                                                           | F21G4.6                   |
| Hypogonadotropic hypogonadism                  | <i>GNRHR</i> (gonadotropin releasing hormone receptor)                                                           | <i>gnrr-1</i>             |
| Isovalericacidemia                             | <i>IVD</i> (isovaleryl-CoA dehydrogenase)                                                                        | <i>ivd-1</i>              |
| Krabbe disease                                 | <i>GALC</i> (galactocerebrosidase)                                                                               | C29E4.10                  |
| Lissencephaly/Miller-Dieker syndrome           | <i>LIS1</i> (platelet activating factor acetylhydrolase)                                                         | <i>lis-1</i>              |
| Long QT-syndrome, type 1                       | <i>KVLQT1/LQT1</i> (potassium channel)                                                                           | <i>kqt-3</i>              |
| Lysosomal beta-mannosidase deficiency          | <i>MANBA</i> (beta-mannosidase)                                                                                  | C33G3.4                   |
| Malignant hyperthermia/central core disease    | <i>RYR1</i> (ryanodine receptor)                                                                                 | <i>unc-68</i>             |
| Maple syrup urine disease, type Ia;            | <i>BCKDHB</i> (branched chain keto acid dehydrogenase e1, alpha polypeptide)                                     | F27D4.5                   |

|                                            |                                                                                     |                             |
|--------------------------------------------|-------------------------------------------------------------------------------------|-----------------------------|
| Maple syrup urine disease, type II         | <i>DBT</i> (dihydrolipoamide branched chain transacylase)                           | ZK669.4                     |
| Marfan syndrome                            | <i>FBN1</i> (fibrillin)                                                             | <i>fbn-1</i>                |
| Menkes syndrome                            | <i>ATP7A</i> (Cu <sup>2+</sup> transporting ATPase)                                 | <i>cua-1</i>                |
| McArdle disease                            | <i>PYGM</i> (muscle glycogen phosphorylase)                                         | T22F3.3                     |
| Migraine, familial hemiplegic              | <i>CACNA1A</i> (alpha subunit, P/Q type voltage-dependent Ca <sup>2+</sup> channel) | <i>unc-2</i>                |
| Mucopolipidosis type IV                    | <i>MLIV</i> (mucopolipin-1)                                                         | <i>cup-5</i>                |
| Muscular dystrophy, Duchenne/Becker        | <i>DMD</i> (dystrophin)                                                             | <i>dys-1</i>                |
| Muscular dystrophy, Fukuyama               | <i>FCMD</i> (fukutin)                                                               | T07D3.4                     |
| Muscular dystrophy, limb-girdle, type 2D   | <i>SGCA</i> (sarcoglycan alpha)                                                     | <i>sgca-1</i>               |
| Muscular dystrophy, limb-girdle, type 2E   | <i>SGCB</i> (sarcoglycan beta)                                                      | <i>sgcb-1</i>               |
| Myoshi myopathy                            | <i>DYSF</i> (dysferlin)                                                             | <i>fer-1</i>                |
| Myotonic dystrophy                         | <i>CUGBP1</i> (RNA binding protein)                                                 | <i>etr-1</i>                |
| Neimann-Pick disease type B (NPB)          | <i>ASM</i> (acid sphingomyelinase)                                                  | <i>asm-2</i>                |
| Neimann-Pick disease type C1 (NPC1)        | <i>NPC1</i> (patched membrane domain-containing permease)                           | <i>ncr-1</i> and <i>-2</i>  |
| Neimann-Pick disease type C2 (NPC2)        | <i>NPC2</i> (cholesterol-binding protein)                                           | <i>heh-1</i>                |
| Orotic aciduria I                          | <i>UPMS</i> (uridine monophosphate synthetase)                                      | T07C4.1                     |
| Osteogenesis imperfecta                    | <i>COL4A2</i> (type IV collagen)                                                    | <i>let-2</i> , <i>emb-9</i> |
| Pallister-Hall syndrome                    | <i>GLI3</i> (GLI-Kruppel family transcription factor)                               | <i>tra-1</i>                |
| Parkinson's disease                        | <i>PARK2</i> (parkin)                                                               | <i>pr-1</i>                 |
| Pelizaeus-Merzbacher disease               | <i>PLP1</i> (proteolipid protein 1)                                                 | <i>mngp-1</i>               |
| Phenylketonuria                            | <i>PAH</i> (phenylalanine-4-hydroxylase)                                            | <i>pah-1</i>                |
| Polycystic kidney disease, type 1          | <i>PKD1</i> (polycystin-1)                                                          | <i>lov-1</i>                |
| Polycystic kidney disease, type 2          | <i>PKD2</i> (polycystin-1)                                                          | <i>pkd-2</i>                |
| Refsum disease                             | <i>PHYH</i> (phytanoyl-coa hydroxylase)                                             | ZK550.6                     |
| Schindler disease                          | <i>GALB</i> (alpha-galactosidase B)                                                 | <i>gana-1</i>               |
| Severe combined immunodeficiency, X-linked | <i>IL2RG</i> (interleukin 2 receptor, gamma)                                        | T20B12.4                    |
| Smith-Lemli-Opitz syndrome                 | <i>DHCR7</i> (7-dehydrocholesterol reductase)                                       | B0250.9                     |
| Sorsby fundus dystrophy                    | <i>TIMP3</i> (tissue inhibitor of metalloproteinase 3)                              | <i>cri-2</i>                |
| Spastic paraplegia 4                       | <i>SPAST</i> (spastin, AAA ATPase)                                                  | <i>spas-1</i>               |
| Spinal muscular atrophy                    | <i>SMN</i> (survival motor neuron, an mRNA splicing protein)                        | <i>smn-1</i>                |
| Spinocerebellar ataxia 1                   | <i>SCA1</i> (ataxin-1)                                                              | K04F10.1                    |
| Spinocerebellar ataxia 2                   | <i>SCA2</i> (ataxin-2)                                                              | <i>atx-2</i>                |
| Stargardt disease                          | <i>ABCA4</i> (ABC transporter)                                                      | <i>abt-4</i>                |
| Vitamin D-resistant rickets                | <i>VDR</i> (steroid hormone receptor)                                               | <i>daf-12</i>               |
| Vitelliform macular dystrophy              | <i>VMD2</i> (vitelliform macular dystrophy protein)                                 | C01B12.3                    |
| Waardenburg syndrome                       | <i>PAX3</i> (paired homeobox domain)                                                | <i>vab-3</i>                |
| Werner syndrome                            | <i>WRN</i> (RecQ DNA helicase)                                                      | <i>wrn-1</i>                |
| Wernicke-Korsakoff syndrome                | <i>TKT</i> (transketolase)                                                          | D2007.2                     |
| Wilson disease                             | <i>ATP7B</i> (Cu <sup>2+</sup> transporting ATPase)                                 | <i>cua-1</i>                |
| Xeroderma pigmentosum B/Cockayne syndrome  | <i>ERCC2</i> (excision repair cross-complementing group 2)                          | Y50D7A.2                    |
|                                            | <i>ERCC3</i> (excision repair cross-complementing group 3)                          | Y66D12A.15                  |
|                                            | <i>ERCC5</i> (excision repair cross-complementing group 5)                          | <i>xpg-1</i>                |
| Zellweger syndrome 3/Refsum disease        | <i>PXMP3</i> (peroxisomal membrane protein 3)                                       | <i>prx-2</i>                |
| <b>CANCER</b>                              |                                                                                     |                             |
| Adenomatous polyposis coli                 | <i>APC</i> (tumor suppressor in beta-catenin signaling pathway)                     | <i>apr-1</i>                |
| Cowden disease                             | <i>PTEN</i> (tumor suppressor, phosphatase and tensin)                              | <i>daf-18</i>               |
| Hereditary non-polyposis colon cancer      | <i>MLH1</i> (DNA mismatch repair)                                                   | <i>mlh-1</i>                |
|                                            | <i>MSH2</i> (MutS DNA repair)                                                       | <i>msh-2</i>                |
| Leukemia, juvenile myelomonocytic          | <i>GRAF</i> (GTPase regulator associated with focal adhesion kinase)                | T04C9.1                     |
| Li-Fraumeni syndrome                       | <i>TP53</i> (p53 tumor suppressor)                                                  | <i>cep-1</i>                |
| Multiple endocrine neoplasia, type 2a      | <i>RET</i> (receptor tyrosine kinase)                                               | <i>egl-15</i>               |
| Nevoid basal cell carcinoma syndrome       | <i>PTCH</i> (SSD patched membrane protein)                                          | <i>ptc-1</i>                |
| Neurofibromatosis, type 2                  | <i>NF2</i> (talin family)                                                           | <i>nfm-1</i>                |
| Pancreatic carcinoma                       | <i>DPC4</i> (TGFβ signal transducer)                                                | <i>sma-4</i>                |
| Retinoblastoma                             | <i>RBI</i> (tumor suppressor)                                                       | <i>lin-35</i>               |

Partial list of genes compiled from several sources including WormBase, WormBook, OMIM and (7-9, 86)
